# Supplementary material for: Determination of total phenol and six polyphenolic components in the polyphenol extract of Cinnamomi cortex by quantitative nuclear magnetic resonance spectroscopy
Source: Royal Society of Chemistry journal article supplement (doi:10.1039/d3ay01501g), 2023-01-01
Supplement: d3ay01501g1.pdf [file d3ay01501g1.pdf]

## SUPPORTING INFORMATION

### **Determination of Total Phenol and Six Polyphenolic Components in Polyphenol Extract of *Cinnamomi Cortex* by Quantitative Nuclear Magnetic Resonance Spectroscopy**

Dan-Yang Shi, Yu Zheng, Qiang-Sheng Guo, Can Gong, Xu Xu\*, Jian-Ping Gao\*

#### **Table of contents:**

|                                                                                                                         |   |
|-------------------------------------------------------------------------------------------------------------------------|---|
| Determination of total sugar content by phenol sulfuric acid method .....                                               | 2 |
| Table S1 Determination of Total Sugar in Cinnamon Polyphenol Extract Samples by Phenol Sulfuric Acid Method (n=3) ..... | 2 |
| Table S2 Intra-day and intra-day precision of total phenol qNMR determination (n=6) .....                               | 2 |
| Table S3 Linear relationship of total phenol qNMR determination .....                                                   | 3 |
| Table S4 The recovery of total phenol qNMR determination (n=4) .....                                                    | 3 |
| Table S5 Intra-day and inter-day precision of qNMR determination of polyphenol components (n=6) .....                   | 3 |
| Table S6 Linear relationship of qNMR determination of polyphenol components .....                                       | 3 |
| Table S7 Recovery of qNMR determination DMSO-d <sub>6</sub> method of polyphenol components (n=4) ..                    | 4 |
| Table S8 Recovery of qNMR determination D <sub>2</sub> O method of polyphenol components (n=4) .....                    | 5 |
| Table S9 HPLC Method Validation including precision, linearity, sensitivity and recovery .....                          | 5 |

### Determination of total sugar content by phenol sulfuric acid method

Glucose reference substance (25 mg) was accurately weighed and dissolved in a 100 mL brown volumetric flask. Accurately took 2 mL, 4 mL, 6 mL, 8 mL and 10 mL of the reference solution in a 25 mL brown volumetric flask respectively. Took 2 mL of glucose solution of different concentration into a brown reagent bottle, added 1.22 mL of phenol solution (6%) and 5 mL of concentrated sulfuric acid. Mixed them evenly. After 20 minutes, the absorbance was measured with ultraviolet spectrophotometer at 490 nm with reagent blank reference solution. The standard curve of absorbance to glucose concentration was regressed.

Accurately weighed cinnamom polyphenol extract sample in brown volumetric flask, added water to dissolve, ultrasonic mixing, cooled down, diluted it with water to the scale and shaken up. Accurately took 5 mL of the reference solution in a 25 mL brown volumetric flask. Took 2 mL of solution, added 1.22 mL of phenol solution (6%) and 5 mL of concentrated sulfuric acid, and mixed them evenly. The absorbance was measured at 490 nm with the reagent blank reference solution.

**Table S1** Determination of Total Sugar in Cinnamon Polyphenol Extract Samples by Phenol Sulfuric Acid Method (n=3)

| Sample  | carbohydrate content(%) |
|---------|-------------------------|
| Sample1 | 54.49                   |
| Sample2 | 24.32                   |
| Sample3 | 45.78                   |

**Table S2** Intra-day and intra-day precision of total phenol qNMR determination (n=6)

| Sample No        | Frequency                      | 1    | 2    | 3    | 4    | 5    | 6    | Average | RSD(%) |
|------------------|--------------------------------|------|------|------|------|------|------|---------|--------|
| Sample 1         | A <sub>s</sub> /A <sub>r</sub> | 2.81 | 2.81 | 2.81 | 2.80 | 2.81 | 2.80 | 2.81    | 0.18   |
|                  | A <sub>s</sub> /A <sub>r</sub> | 2.80 | 2.80 | 2.80 | 2.81 | 2.81 | 2.81 | 2.80    | 0.29   |
| Sample 2         | A <sub>s</sub> /A <sub>r</sub> | 9.26 | 9.30 | 9.26 | 9.29 | 9.26 | 9.30 | 9.28    | 0.22   |
|                  | A <sub>s</sub> /A <sub>r</sub> | 9.26 | 9.27 | 9.32 | 9.30 | 9.25 | 9.31 | 9.29    | 0.31   |
| Sample 3         | A <sub>s</sub> /A <sub>r</sub> | 1.30 | 1.34 | 1.32 | 1.31 | 1.30 | 1.30 | 1.31    | 1.22   |
|                  | A <sub>s</sub> /A <sub>r</sub> | 1.27 | 1.30 | 1.31 | 1.23 | 1.30 | 1.28 | 1.28    | 2.28   |
| Self-made sample | A <sub>s</sub> /A <sub>r</sub> | 3.33 | 3.45 | 3.45 | 3.45 | 3.33 | 3.33 | 3.39    | 1.86   |
|                  | A <sub>s</sub> /A <sub>r</sub> | 3.45 | 3.33 | 3.45 | 3.33 | 3.33 | 3.23 | 3.35    | 2.51   |

**Table S3** Linear relationship of total phenol qNMR determination

| Zero intercept linear equation | R      | Non-zero intercept linear equation | R      | Theoretical slope value | Actual slope value | Deviation of slope value (%) |
|--------------------------------|--------|------------------------------------|--------|-------------------------|--------------------|------------------------------|
| EC y=0.3567x                   | 0.9999 | y=0.3646x-0.0068                   | 0.9999 | 0.3518                  | 0.3567             | 1.40                         |

**Table S4** The recovery of total phenol qNMR determination (n=4)

|                       | 1     | 2     | 3    | 4    | Mean(%) | RSD(%) |
|-----------------------|-------|-------|------|------|---------|--------|
| Sample weight (mg)    | 70.6  | 70.7  | 70.6 | 70.4 |         |        |
| Content(mg)           | 22.0  | 22.0  | 22.0 | 21.9 |         |        |
| Added(mg)             | 0.338 | 0.857 | 1.19 | 1.85 |         |        |
| Measured quantity(mg) | 22.3  | 22.9  | 23.2 | 24.0 |         |        |
| Recovery(%)           | 98.5  | 97.3  | 102  | 104  | 100     | 3.09   |

**Table S5** Intra-day and inter-day precision of qNMR determination of polyphenol components (n=6)

|                                             | Sample | Frequency                      | 1    | 2    | 3    | 4    | 5    | 6    | Average | RSD(%) |       |
|---------------------------------------------|--------|--------------------------------|------|------|------|------|------|------|---------|--------|-------|
| Method 1<br>(DMSO-d <sub>6</sub><br>method) | GA     | A <sub>s</sub> /A <sub>r</sub> | 1.30 | 1.30 | 1.32 | 1.30 | 1.30 | 1.30 | 1.30    | 1.30   | 0.54% |
|                                             |        | A <sub>s</sub> /A <sub>r</sub> | 1.32 | 1.30 | 1.32 | 1.32 | 1.30 | 1.30 | 1.31    | 0.72%  |       |
|                                             | EC     | A <sub>s</sub> /A <sub>r</sub> | 0.88 | 0.87 | 0.88 | 0.87 | 0.87 | 0.87 | 0.87    | 0.87   | 0.72% |
|                                             |        | A <sub>s</sub> /A <sub>r</sub> | 0.88 | 0.87 | 0.87 | 0.88 | 0.87 | 0.88 | 0.88    | 0.88   | 0.79% |
|                                             | ECG    | A <sub>s</sub> /A <sub>r</sub> | 0.13 | 0.13 | 0.13 | 0.13 | 0.13 | 0.13 | 0.13    | 0.13   | 0.54% |
|                                             |        | A <sub>s</sub> /A <sub>r</sub> | 0.13 | 0.13 | 0.13 | 0.13 | 0.13 | 0.13 | 0.13    | 0.13   | 0.72% |
|                                             | EGCG   | A <sub>s</sub> /A <sub>r</sub> | 0.38 | 0.38 | 0.38 | 0.38 | 0.38 | 0.38 | 0.38    | 0.38   | 0.54% |
|                                             |        | A <sub>s</sub> /A <sub>r</sub> | 0.38 | 0.38 | 0.38 | 0.38 | 0.38 | 0.38 | 0.38    | 0.38   | 0.72% |
|                                             | EGC    | A <sub>s</sub> /A <sub>r</sub> | 0.32 | 0.32 | 0.33 | 0.32 | 0.32 | 0.32 | 0.32    | 0.33   | 0.54% |
|                                             |        | A <sub>s</sub> /A <sub>r</sub> | 0.33 | 0.32 | 0.32 | 0.33 | 0.32 | 0.32 | 0.32    | 0.32   | 1.48% |
|                                             | GCG    | A <sub>s</sub> /A <sub>r</sub> | 0.09 | 0.09 | 0.09 | 0.09 | 0.09 | 0.09 | 0.09    | 0.09   | 0.54% |
|                                             |        | A <sub>s</sub> /A <sub>r</sub> | 0.09 | 0.09 | 0.09 | 0.09 | 0.09 | 0.09 | 0.09    | 0.09   | 0.72% |
| Method 2<br>(D <sub>2</sub> O method)       | EC     | A <sub>s</sub> /A <sub>r</sub> | 0.05 | 0.05 | 0.05 | 0.05 | 0.05 | 0.05 | 0.05    | 0.05   | 1.08% |
|                                             |        | A <sub>s</sub> /A <sub>r</sub> | 0.05 | 0.05 | 0.05 | 0.05 | -    | -    | -       | -      | 1.19% |
|                                             | EGC    | A <sub>s</sub> /A <sub>r</sub> | 0.02 | 0.02 | 0.02 | 0.02 | 0.02 | 0.02 | 0.02    | 0.02   | 0.78% |
|                                             |        | A <sub>s</sub> /A <sub>r</sub> | 0.02 | 0.02 | 0.02 | 0.02 | -    | -    | -       | -      | 0.79% |
|                                             | GCG    | A <sub>s</sub> /A <sub>r</sub> | 0.01 | 0.01 | 0.01 | 0.01 | 0.01 | 0.01 | 0.01    | 0.01   | 1.04% |
|                                             |        | A <sub>s</sub> /A <sub>r</sub> | 0.01 | 0.01 | 0.01 | 0.01 | -    | -    | -       | -      | 1.14% |

**Table S6** Linear relationship of qNMR determination of polyphenol components

|                                             |      | Zero intercept linear equation | R      | Non-zero intercept linear equation | R      | Theoretical slope value | Actual slope value | Deviation(%) |
|---------------------------------------------|------|--------------------------------|--------|------------------------------------|--------|-------------------------|--------------------|--------------|
| Method 1<br>(DMSO-d <sub>6</sub><br>method) | GA   | y=1.2441x                      | 0.9999 | y=1.2465x-0.003                    | 0.9998 | 1.2004                  | 1.2441             | 3.64         |
|                                             | EC   | y=0.3567x                      | 0.9999 | y=0.3646x-0.0068                   | 0.9999 | 0.3518                  | 0.3567             | 1.40         |
|                                             | EGCG | y=0.4449x                      | 0.9998 | y=0.4535x-0.008                    | 0.9996 | 0.4455                  | 0.4449             | 0.14         |
|                                             | ECG  | y=0.2291x                      | 0.9997 | y=0.2222x+0.0022                   | 0.9995 | 0.2308                  | 0.2291             | 0.75         |
|                                             | EGC  | y=0.6507x                      | 0.9999 | y=0.6598x-0.0044                   | 0.9999 | 0.6668                  | 0.6507             | 2.41         |
|                                             | GCG  | y=0.4314x                      | 0.9999 | y=0.4200x+0.0077                   | 0.9999 | 0.4455                  | 0.4314             | 3.17         |
| Method 2<br>(D <sub>2</sub> O<br>method)    | EC   | y=0.6872x                      | 0.9999 | y=0.6728x+0.0212                   | 0.9999 | 0.7036                  | 0.6872             | 2.32         |
|                                             | EGC  | y=0.6666x                      | 0.9999 | y=0.6622x+0.0069                   | 0.9997 | 0.6668                  | 0.6666             | 0.03         |
|                                             | GCG  | y=0.4377x                      | 0.9996 | y=0.4157x+0.0104                   | 0.9999 | 0.4455                  | 0.4377             | 1.76         |

**Table S7** Recovery of qNMR determination DMSO-d<sub>6</sub> method of polyphenol components (n=4)

| Sample | Frequency | 1 | 2 | 3 | 4 | Mean(%) | RSD(%) |
|--------|-----------|---|---|---|---|---------|--------|
|--------|-----------|---|---|---|---|---------|--------|

|      |                        |       |       |       |       |      |      |
|------|------------------------|-------|-------|-------|-------|------|------|
| GCG  | Sample weight (mg)     | 40.8  | 35.4  | 45.2  | 43.3  |      |      |
|      | Content (mg)           | 0.610 | 0.530 | 0.680 | 0.650 |      |      |
|      | Added (mg)             | 0.290 | 0.840 | 1.67  | 3.03  |      |      |
|      | Measured quantity (mg) | 0.910 | 1.37  | 2.35  | 3.66  |      |      |
|      | Recovery (%)           | 101   | 99.8  | 100   | 99.2  | 100  | 0.71 |
| ECG  | Sample weight (mg)     | 41.6  | 39.8  | 34.9  | 45.2  |      |      |
|      | Content (mg)           | 1.67  | 1.60  | 1.40  | 1.82  |      |      |
|      | Added (mg)             | 1.88  | 1.94  | 2.95  | 3.41  |      |      |
|      | Measured quantity (mg) | 3.62  | 3.66  | 4.53  | 5.44  |      |      |
|      | Recovery (%)           | 99.5  | 102   | 102   | 102   | 102  | 0.09 |
| GA   | Sample weight (mg)     | 10.0  | 10.2  | 9.70  | 8.73  |      |      |
|      | Content (mg)           | 1.29  | 1.31  | 1.25  | 1.12  |      |      |
|      | Added (mg)             | 0.560 | 0.750 | 0.880 | 1.05  |      |      |
|      | Measured quantity (mg) | 1.85  | 2.06  | 2.11  | 2.15  |      |      |
|      | Recovery (%)           | 102   | 99.5  | 98.4  | 98.1  | 100  | 1.85 |
| EGCG | Sample weight (mg)     | 40.1  | 40.8  | 38.8  | 34.9  |      |      |
|      | Content (mg)           | 4.10  | 4.18  | 3.97  | 3.57  |      |      |
|      | Added (mg)             | 1.46  | 2.29  | 4.18  | 6.52  |      |      |
|      | Measured quantity (mg) | 5.57  | 6.49  | 8.14  | 10.2  |      |      |
|      | Recovery (%)           | 101   | 101   | 99.7  | 101   | 101  | 0.72 |
| EC   | Sample weight (mg)     | 38.8  | 40.8  | 40.1  | 34.9  |      |      |
|      | Content (mg)           | 0.460 | 0.480 | 0.470 | 0.410 |      |      |
|      | Added (mg)             | 0.350 | 0.510 | 0.560 | 1.05  |      |      |
|      | Measured quantity (mg) | 0.810 | 0.990 | 1.04  | 1.44  |      |      |
|      | Recovery (%)           | 98.8  | 100   | 102   | 97.8  | 99.7 | 1.61 |
| EGC  | Sample weight (mg)     | 40.8  | 41.6  | 45.2  | 43.3  |      |      |
|      | Content (mg)           | 0.510 | 0.520 | 0.570 | 0.550 |      |      |
|      | Added (mg)             | 0.500 | 1.12  | 1.91  | 4.18  |      |      |
|      | Measured quantity (mg) | 1.02  | 1.67  | 2.51  | 4.74  |      |      |
|      | Recovery (%)           | 101   | 103   | 102   | 100   | 102  | 0.89 |

**Table S8** Recovery of qNMR determination  $D_2O$  method of polyphenol components ( $n=4$ )

| Sample | Frequency          | 1     | 2     | 3     | 4     | Mean(%) | RSD(%) |
|--------|--------------------|-------|-------|-------|-------|---------|--------|
| EGC    | Sample weight (mg) | 61.2  | 63.9  | 58.1  | 56.0  |         |        |
|        | Content (mg)       | 0.140 | 0.140 | 0.130 | 0.130 |         |        |
|        | Added (mg)         | 1.13  | 3.07  | 4.47  | 6.00  |         |        |

|     |                        |        |        |        |        |      |      |
|-----|------------------------|--------|--------|--------|--------|------|------|
| GCG | Measured quantity (mg) | 1.26   | 3.15   | 4.56   | 6.24   | 99.6 | 1.51 |
|     | Recovery (%)           | 99.5   | 98.2   | 99.0   | 102    |      |      |
|     | Sample weight (mg)     | 57.3   | 58.2   | 62.9   | 64.9   |      |      |
|     | Content (mg)           | 0.0500 | 0.0500 | 0.0600 | 0.0600 |      |      |
|     | Added (mg)             | 2.13   | 3.33   | 4.00   | 5.66   |      |      |
| EC  | Measured quantity (mg) | 2.13   | 3.42   | 3.91   | 5.76   | 99.4 | 2.34 |
|     | Recovery (%)           | 97.7   | 101    | 96.4   | 101    |      |      |
|     | Sample weight (mg)     | 57.3   | 58.2   | 62.9   | 64.9   |      |      |
|     | Content (mg)           | 0.150  | 0.150  | 0.170  | 0.170  |      |      |
|     | Added (mg)             | 0.530  | 1.82   | 3.68   | 4.36   |      |      |
|     | Measured quantity (mg) | 0.670  | 1.970  | 3.84   | 4.53   | 98.2 | 1.04 |
|     | Recovery (%)           | 97.5   | 99.6   | 97.3   | 98.3   |      |      |

**Table S9 HPLC Method Validation including precision, linearity, sensitivity and recovery**

| Compound | RSD%(n=6) | Linearity               | Sensitivity |            | recovery rates(Mean±RSD)(n=3) |
|----------|-----------|-------------------------|-------------|------------|-------------------------------|
|          | intra-day | correlation coefficient | LOD (µg/mL) | LOQ(µg/mL) | Sample 1 (%)                  |
| GA       | 0.34      | 0.9999                  | 0.07        | 0.24       | 95.67±1.32                    |
| EC       | 2.71      | 0.9999                  | 0.40        | 1.30       | 95.32±2.31                    |
| ECG      | 0.26      | 0.9999                  | 0.17        | 0.58       | 98.02±2.52                    |
| EGCG     | 0.22      | 0.9999                  | 0.26        | 0.88       | 100.73±5.30                   |
| EGC      | 0.29      | 0.9997                  | 0.26        | 0.88       | 99.95±0.11                    |
| GCG      | 1.48      | 0.9999                  | 0.66        | 2.20       | 95.91±1.30                    |
